# Supplementary material for: Electric field tunability of the electronic properties and contact types in the MoS2/SiH heterostructure
Source: Royal Society of Chemistry journal article supplement (doi:10.1039/d2ra03817j), 2022-01-01
Supplement: d2ra03817j1.pdf [file d2ra03817j1.pdf]

Supporting Information (SI)

**Electric field tunable of the electronic properties  
and contact types in MoS<sub>2</sub>/SiH heterostructure**

Son-Tung Nguyen<sup>1</sup>, Chuong V. Nguyen<sup>2</sup>, Kien Nguyen-Ba<sup>3</sup>, Huy Le-Quoc<sup>3,†</sup>, Nguyen  
V. Hieu<sup>4</sup> and Cuong Q. Nguyen<sup>5,6,†</sup>

<sup>1</sup>*Faculty of Electrical Engineering Technology, Hanoi University of Industry, Hanoi 100000,  
Vietnam*

<sup>2</sup>*Department of Materials Science and Engineering,  
Le Quy Don Technical University, Ha Noi 100000, Vietnam*

<sup>3</sup>*The University of Danang - University of Science and Technology, Danang 550000,  
Vietnam.*

<sup>4</sup>*Physics Department, The University of Danang - University of Science and Education, Da Nang  
550000, Vietnam*

<sup>5</sup>*Institute of Research and Development, Duy Tan University, Da Nang 550000, Vietnam.*

<sup>6</sup>*Faculty of Natural Sciences, Duy Tan University, Da Nang 550000, Vietnam*

†Corresponding authors: [lqhuy@dut.udn.vn](mailto:lqhuy@dut.udn.vn) and [nguyenquangcuong3@duytan.edu.vn](mailto:nguyenquangcuong3@duytan.edu.vn)

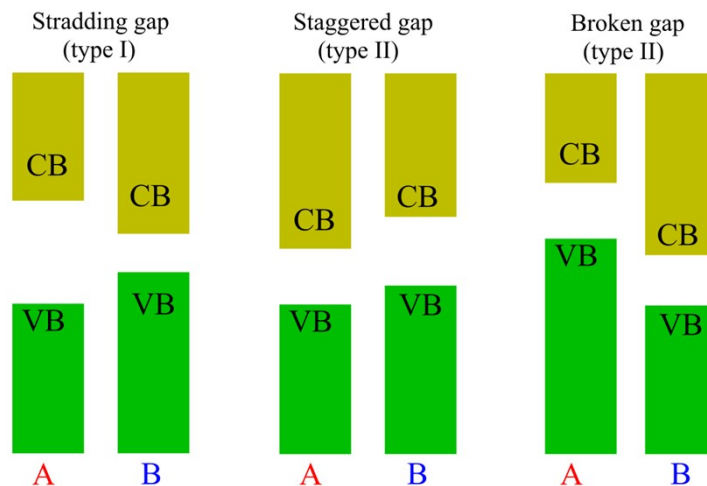

Fig. S1. Band alignments between two different semiconductors A and B.

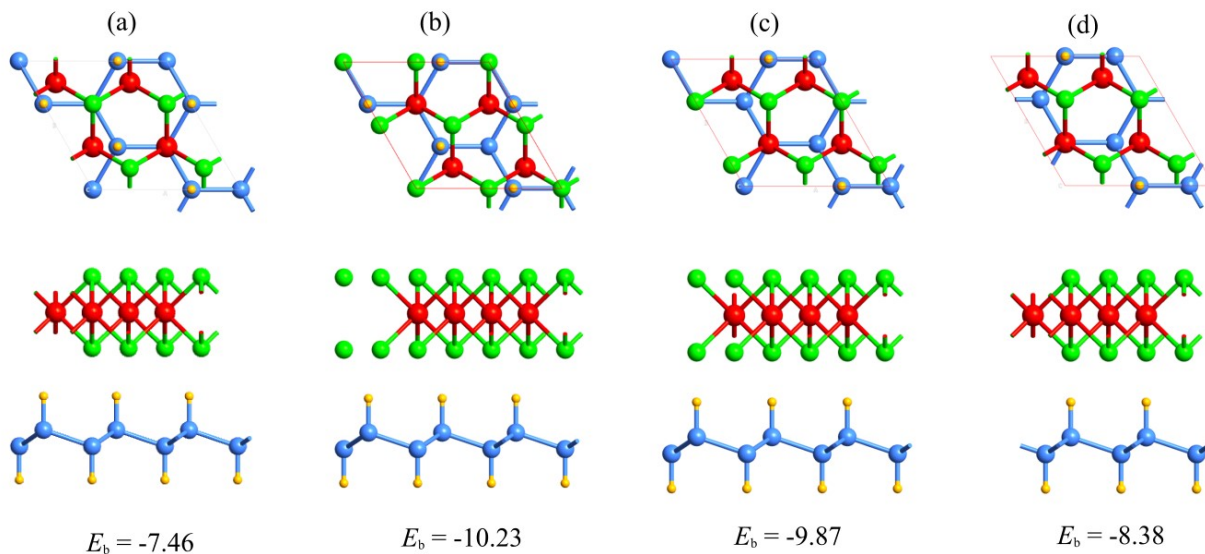

Fig. S2. Different stacking configurations of MoS2/SiH heterostructures (a) stacking I, (b) stacking II, (c) stacking III and (d) stacking IV.

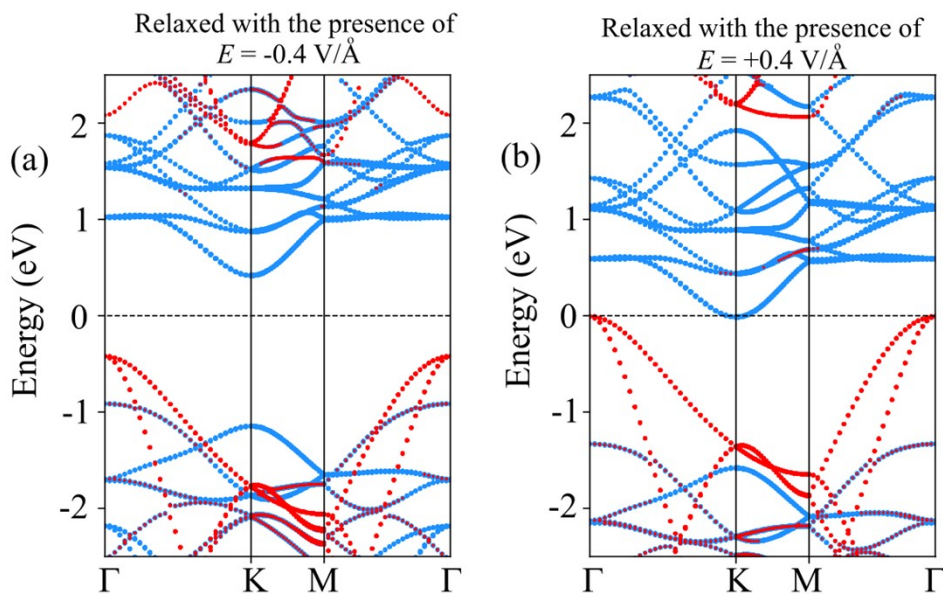

Fig. S3. Projected band structures of MoS2/SiH heterostructure under the applied strengths of electric field of (a)  $E = -0.4 \text{ V/\AA}$  and (b)  $E = +0.4 \text{ V/\AA}$ . These values of electric field were applied for both the geometric optimization and electronic properties calculations.
